# Supplementary material
Source: PubMed Central journal article supplement (PMC5458540)
Supplement: FigureS1.pdf [file FigureS1.pdf]

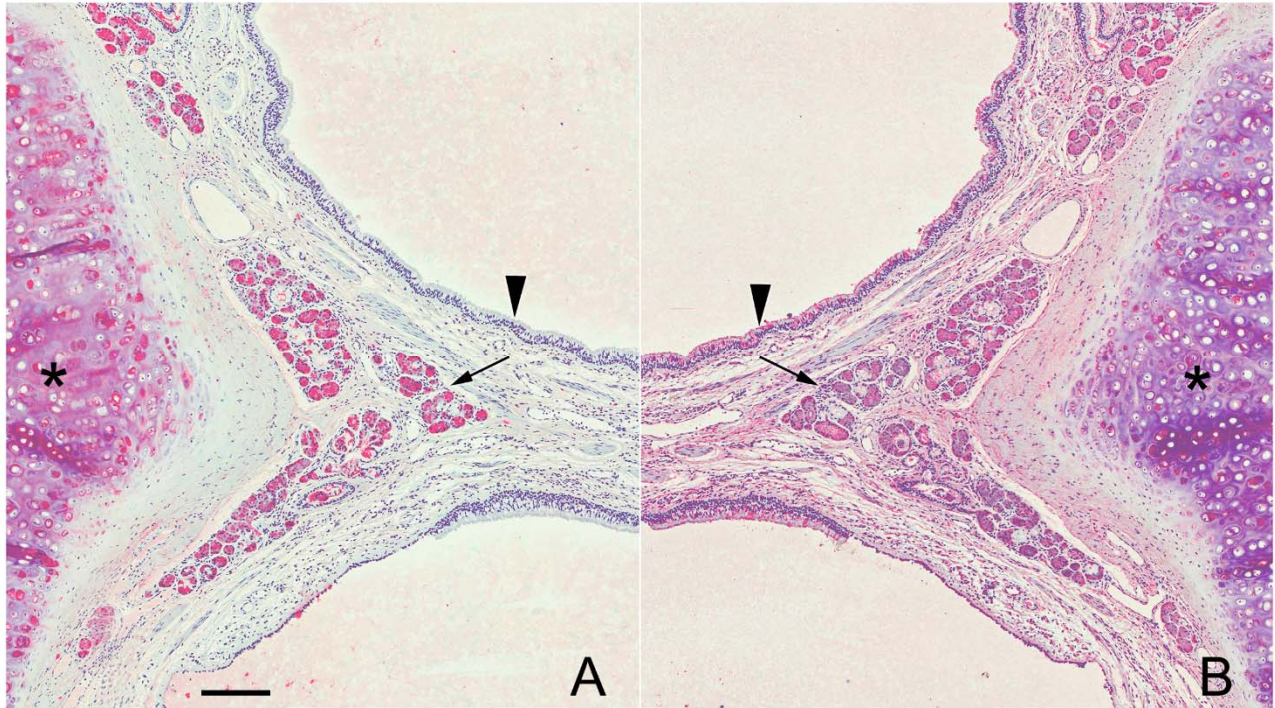

**Fig. S1.** Siglec-8-Fc and Siglec-9-Fc overlay of human bronchus. Serial cross sections of human airway at the junction of the primary and secondary bronchus were stained with Siglec-8-Fc (A) or Siglec-9-Fc (B) precomplexed with AP-conjugated anti-human-Fc. Lectin binding was detected using Vector Red stain and sections counterstained using Hematoxylin QS. Images are displayed in mirror image to emphasize differential siglec ligand distributions. Arrowheads: airway epithelium; arrows: submucosal glands; asterisks: cartilage. Scale bar, 200  $\mu\text{m}$ .
