# Supplementary material
Source: PubMed Central journal article supplement (PMC5458540)
Supplement: SuppTable1.pdf [file SuppTable1.pdf]

Supplementary Table 1. Glycans on the CFG<sup>a</sup> and glycolipid arrays

| CFG Glycan Array                                                                    |                        | Glycolipid Array                                                                     |               |
|-------------------------------------------------------------------------------------|------------------------|--------------------------------------------------------------------------------------|---------------|
| Glycan                                                                              | Abbreviation           | Glycan                                                                               | Abbreviation  |
|    | SLacNAc                |   | 6-Su-SLacNAc  |
|    | 6-Su-SLacNAc           |   | 6'-Su-SLacNAc |
|    | 6'-Su-SLacNAc          |   | GM3           |
|    | SLe <sup>x</sup>       |    | GD3           |
|    | 6-Su-SLe <sup>x</sup>  |    | GM1           |
|    | 6'-Su-SLe <sup>x</sup> |    | GM1b          |
|    | Neu5Ac                 |    | di-Su-GM1b    |
|    | GM3                    |    | GD1a          |
|  | SLacNAcMan             |  | GD1b          |
|  | biantennary 1          |  | GD1a          |
|  | biantennary 2          |  | GT1b          |
|  | triantennary 1         |  | GQ1b          |
|  | triantennary 2         |  | GQ1ba         |
|  | tetraantennary         |                                                                                      |               |

<sup>a</sup>The CFG Glycan Array structures shown include only sialoglycans that supported binding of one or more of the tested siglecs as described in the text. A list of all glycans on the CFG glycan array version 5.1 (610 glycans) is available at: <http://glycomics.scripps.edu/CoreH/CoreHarray070112V5.1.pdf>
